# Supplementary material for: Substitution degree engineering the crystal packing and optoelectronic properties of benzofuranvinyl-substituted benzene-cored derivatives
Source: Royal Society of Chemistry journal article supplement (doi:10.1039/c4tc00220b), 2014-01-01
Supplement: c4tc00220b1.pdf [file c4tc00220b1.pdf]

## Supplementary Information

### Substitution Degree Engineering the Crystal Packing and Optoelectronic Properties of Benzofuranvinyl-Substituted Benzene-Cored Derivatives

Jin-Xing Qiu,<sup>a</sup> Ye-Xin Li,<sup>\*a,b</sup> Xiao-Feng Yang,<sup>a</sup> Yong Nie,<sup>a</sup> Zhen-Wei Zhang,<sup>a</sup> Zhong-He Chen,<sup>a</sup> and Guo-Xin Sun<sup>\*a</sup>

<sup>a</sup> School of Chemistry and Chemical Engineering, University of Jinan, 250022, Jinan, China

<sup>b</sup> State Key Laboratory of Crystal Materials, Shandong University, 250100, Jinan, China

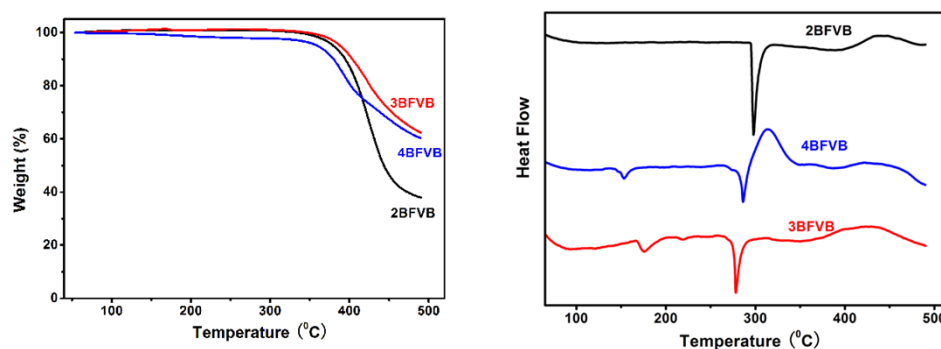

Fig. S1 TG and DSC curves of 2BFVB, 3BFVB and 4BFVB

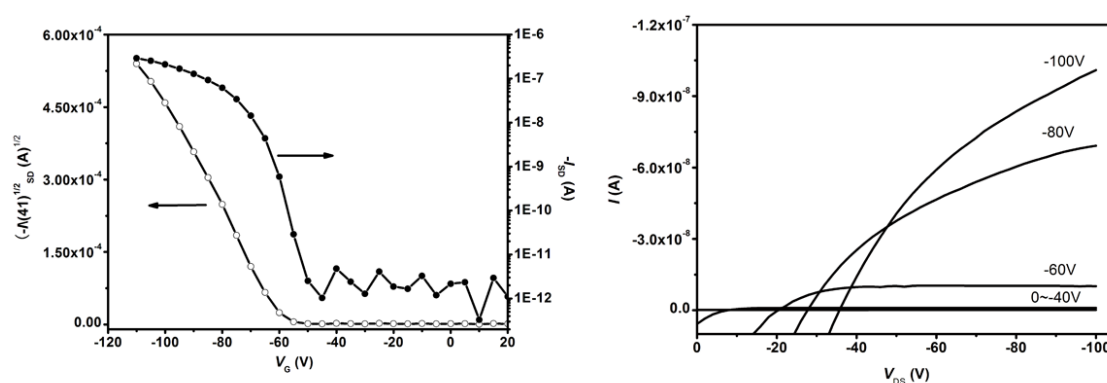

Fig. S2 OFET characteristics of 2BFVB ( $T_{\text{sub}} = 90\text{ }^{\circ}\text{C}$ ).

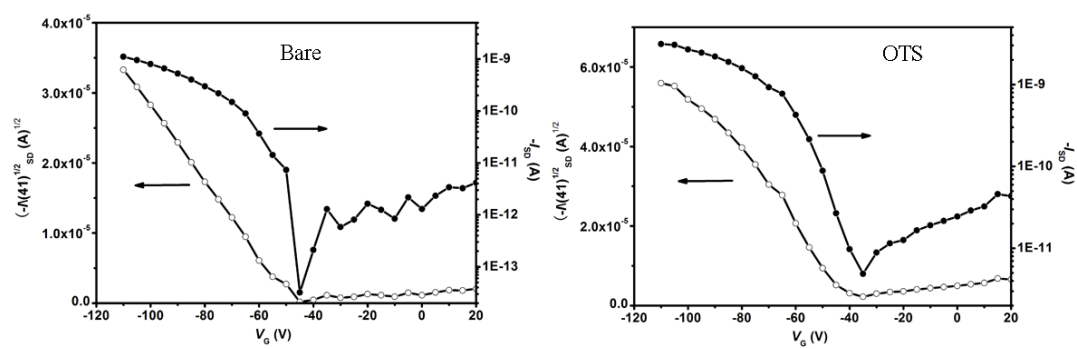

**Fig. S3** OFET characteristics of **3BFVB** ( $T_{\text{sub}} = 60\text{ }^{\circ}\text{C}$ ).
